# Supplementary material
Source: publisher figshare collection journal article supplement (https://acs.figshare.com/ndownloader/files/9486631)
Supplement: Supplementary file 1 [file 9486631]

## **Supporting Information 6**

### **Comprehensive Experimental and Kinetic Modeling Study of *n*-Tetradecane Combustion**

Meirong Zeng<sup>†</sup>, Wenhao Yuan,<sup>\*,‡,§</sup> Wei Li<sup>†</sup>, Yan Zhang<sup>†</sup>, Chuangchuang Cao<sup>†</sup>, Tianyu Li<sup>†</sup>,  
Jiabiao Zou<sup>§</sup>

<sup>†</sup>National Synchrotron Radiation Laboratory, University of Science and Technology of China,  
Hefei, Anhui 230029, People's Republic of China

<sup>‡</sup>Collaborative Innovation Center for Advanced Ship and Deep-Sea Exploration and <sup>§</sup>Key  
Laboratory for Power Machinery and Engineering of MOE, Shanghai Jiao Tong University,  
Shanghai 200240, People's Republic of China

---

\* Corresponding author. Email: [yuanwh@sjtu.edu.cn](mailto:yuanwh@sjtu.edu.cn). Tel: +86-21-34204115.

**Table S1.** A list of C<sub>3</sub> and larger species discussed in this work.

| Name                  | Formula                                   | Structure                                                                                            | Name           | Formula                            | Structure                                                                                            |
|-----------------------|-------------------------------------------|------------------------------------------------------------------------------------------------------|----------------|------------------------------------|------------------------------------------------------------------------------------------------------|
| <i>n</i> -tetradecane | <i>n</i> -C <sub>14</sub> H <sub>30</sub> | CH <sub>3</sub> (CH <sub>2</sub> ) <sub>12</sub> CH <sub>3</sub>                                     | 1-tetradecyl   | C <sub>14</sub> H <sub>29</sub> X1 | •CH <sub>2</sub> (CH <sub>2</sub> ) <sub>12</sub> CH <sub>3</sub>                                    |
| 2-tetradecyl          | C <sub>14</sub> H <sub>29</sub> X2        | CH <sub>3</sub> (•CH)(CH <sub>2</sub> ) <sub>11</sub> CH <sub>3</sub>                                | 3-tetradecyl   | C <sub>14</sub> H <sub>29</sub> X3 | CH <sub>3</sub> CH <sub>2</sub> (•CH)(CH <sub>2</sub> ) <sub>10</sub> CH <sub>3</sub>                |
| 4-tetradecyl          | C <sub>14</sub> H <sub>29</sub> X4        | CH <sub>3</sub> (CH <sub>2</sub> ) <sub>2</sub> (•CH)(CH <sub>2</sub> ) <sub>9</sub> CH <sub>3</sub> | 5-tetradecyl   | C <sub>14</sub> H <sub>29</sub> X5 | CH <sub>3</sub> (CH <sub>2</sub> ) <sub>3</sub> (•CH)(CH <sub>2</sub> ) <sub>8</sub> CH <sub>3</sub> |
| 6-tetradecyl          | C <sub>14</sub> H <sub>29</sub> X6        | CH <sub>3</sub> (CH <sub>2</sub> ) <sub>4</sub> (•CH)(CH <sub>2</sub> ) <sub>7</sub> CH <sub>3</sub> | 7-tetradecyl   | C <sub>14</sub> H <sub>29</sub> X7 | CH <sub>3</sub> (CH <sub>2</sub> ) <sub>5</sub> (•CH)(CH <sub>2</sub> ) <sub>6</sub> CH <sub>3</sub> |
| 1-tridecyl            | C <sub>13</sub> H <sub>27</sub> X1        | •CH <sub>2</sub> (CH <sub>2</sub> ) <sub>11</sub> CH <sub>3</sub>                                    | 3-tridecyl     | C <sub>13</sub> H <sub>27</sub> X3 | CH <sub>3</sub> CH <sub>2</sub> (•CH)(CH <sub>2</sub> ) <sub>9</sub> CH <sub>3</sub>                 |
| 7-tridecyl            | C <sub>13</sub> H <sub>27</sub> X7        | CH <sub>3</sub> (CH <sub>2</sub> ) <sub>5</sub> (•CH)(CH <sub>2</sub> ) <sub>5</sub> CH <sub>3</sub> | 1-dodecyl      | C <sub>12</sub> H <sub>25</sub> X1 | •CH <sub>2</sub> (CH <sub>2</sub> ) <sub>10</sub> CH <sub>3</sub>                                    |
| 6-dodecyl             | C <sub>12</sub> H <sub>25</sub> X6        | CH <sub>3</sub> (CH <sub>2</sub> ) <sub>4</sub> (•CH)(CH <sub>2</sub> ) <sub>5</sub> CH <sub>3</sub> | 1-dodecene     | 1-C <sub>12</sub> H <sub>24</sub>  | CH <sub>2</sub> =CH(CH <sub>2</sub> ) <sub>9</sub> CH <sub>3</sub>                                   |
| 1-undecyl             | C <sub>11</sub> H <sub>23</sub> X1        | •CH <sub>2</sub> (CH <sub>2</sub> ) <sub>9</sub> CH <sub>3</sub>                                     | 5-undecyl      | C <sub>11</sub> H <sub>23</sub> X5 | CH <sub>3</sub> (CH <sub>2</sub> ) <sub>3</sub> (•CH)(CH <sub>2</sub> ) <sub>5</sub> CH <sub>3</sub> |
| 1-decyl               | C <sub>10</sub> H <sub>21</sub> X1        | •CH <sub>2</sub> (CH <sub>2</sub> ) <sub>8</sub> CH <sub>3</sub>                                     | 4-decyl        | C <sub>10</sub> H <sub>21</sub> X4 | CH <sub>3</sub> (CH <sub>2</sub> ) <sub>2</sub> (•CH)(CH <sub>2</sub> ) <sub>5</sub> CH <sub>3</sub> |
| 1-nonyl               | C <sub>9</sub> H <sub>19</sub> X1         | •CH <sub>2</sub> (CH <sub>2</sub> ) <sub>7</sub> CH <sub>3</sub>                                     | 3-nonyl        | C <sub>9</sub> H <sub>19</sub> X3  | CH <sub>3</sub> CH <sub>2</sub> (•CH)(CH <sub>2</sub> ) <sub>5</sub> CH <sub>3</sub>                 |
| 1-nonene              | 1-C <sub>9</sub> H <sub>18</sub>          | CH <sub>2</sub> =CH(CH <sub>2</sub> ) <sub>6</sub> CH <sub>3</sub>                                   | 1-octyl        | C <sub>8</sub> H <sub>17</sub> X1  | •CH <sub>2</sub> (CH <sub>2</sub> ) <sub>6</sub> CH <sub>3</sub>                                     |
| 1-octene              | 1-C <sub>8</sub> H <sub>16</sub>          | CH <sub>2</sub> =CH(CH <sub>2</sub> ) <sub>5</sub> CH <sub>3</sub>                                   | 1-heptyl       | C <sub>7</sub> H <sub>15</sub> X1  | •CH <sub>2</sub> (CH <sub>2</sub> ) <sub>5</sub> CH <sub>3</sub>                                     |
| 3-heptyl              | C <sub>7</sub> H <sub>15</sub> X3         | CH <sub>3</sub> CH <sub>2</sub> (•CH)(CH <sub>2</sub> ) <sub>3</sub> CH <sub>3</sub>                 | 1-hexyl        | C <sub>6</sub> H <sub>13</sub> X1  | •CH <sub>2</sub> (CH <sub>2</sub> ) <sub>4</sub> CH <sub>3</sub>                                     |
| 1,3-hexadiene         | 1,3-C <sub>6</sub> H <sub>10</sub>        | CH <sub>2</sub> =CHCH=CHCH <sub>2</sub> CH <sub>3</sub>                                              | 1-pentyl       | C <sub>5</sub> H <sub>11</sub> X1  | •CH <sub>2</sub> (CH <sub>2</sub> ) <sub>3</sub> CH <sub>3</sub>                                     |
| 1-pentene             | 1-C <sub>5</sub> H <sub>10</sub>          | CH <sub>2</sub> =CH(CH <sub>2</sub> ) <sub>2</sub> CH <sub>3</sub>                                   | 1,3-pentadiene | 1,3-C <sub>5</sub> H <sub>8</sub>  | CH <sub>2</sub> =CHCH=CHCH <sub>3</sub>                                                              |
| 1-butyl               | PXC <sub>4</sub> H <sub>9</sub>           | •CH <sub>2</sub> (CH <sub>2</sub> ) <sub>2</sub> CH <sub>3</sub>                                     | 1-butene       | 1-C <sub>4</sub> H <sub>8</sub>    | CH <sub>2</sub> =CHCH <sub>2</sub> CH <sub>3</sub>                                                   |
| 1,3-butadiene         | 1,3-C <sub>4</sub> H <sub>6</sub>         | CH <sub>2</sub> =CHCH=CH <sub>2</sub>                                                                | 2-butene       | 2-C <sub>4</sub> H <sub>8</sub>    | CH <sub>3</sub> CH=CHCH <sub>3</sub>                                                                 |
| 1-propene             | C <sub>3</sub> H <sub>6</sub>             | CH <sub>2</sub> =CHCH <sub>3</sub>                                                                   | 1-propyl       | NXC <sub>3</sub> H <sub>7</sub>    | •CH <sub>2</sub> CH <sub>2</sub> CH <sub>3</sub>                                                     |
| allene                | aC <sub>3</sub> H <sub>4</sub>            | CH <sub>2</sub> =C=CH <sub>2</sub>                                                                   | allyl          | C <sub>3</sub> H <sub>5</sub> XA   | •CH <sub>2</sub> CH=CH <sub>2</sub>                                                                  |
| propargyl             | C <sub>3</sub> H <sub>3</sub>             | •CH <sub>2</sub> C≡CH                                                                                | propyne        | pC <sub>3</sub> H <sub>4</sub>     | CH≡CCH <sub>3</sub>                                                                                  |

# 1. Flow reactor pyrolysis of *n*-decane and *n*-tetradecane

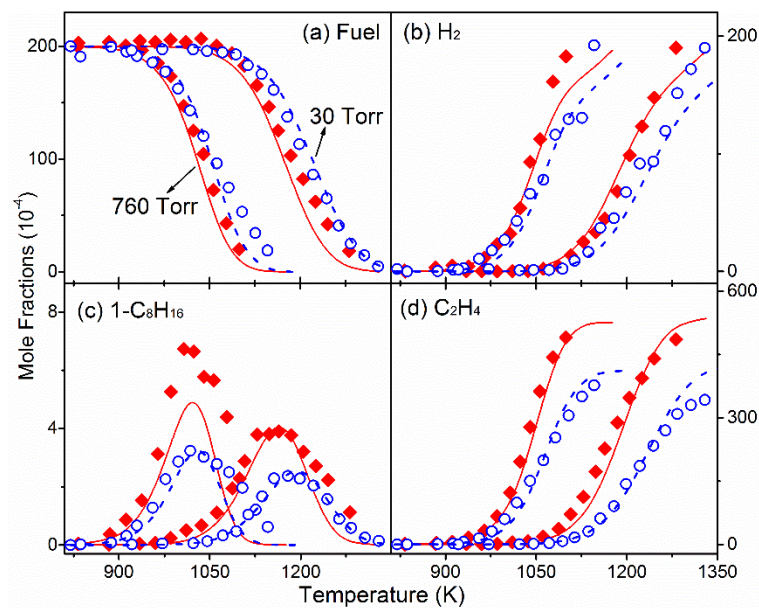

**Figure S1** Experimental (symbols) and simulated (lines) mole fractions of (a) fuel, (b)  $H_2$ , (c)  $1-C_8H_{16}$ , and (d)  $C_2H_4$  in the flow reactor pyrolysis of  $n-C_{14}H_{30}$  and  $n-C_{10}H_{20}$  at 30 Torr and 760 Torr, respectively. Experimental data (hollow circles) represent experiments of  $n-C_{10}H_{20}$  from Zeng and coworkers<sup>1</sup>, and experimental data (solid diamonds) represent experiments of  $n-C_{14}H_{30}$  from present work. Solid lines, and dashed lines represent simulations by present model for the pyrolysis of  $n-C_{14}H_{30}$ , and  $n-C_{10}H_{20}$ , respectively. In Fig. (a), fuel in the  $n-C_{10}H_{20}$  pyrolysis represents mole fraction of  $n-C_{10}H_{20}$  and fuel in the  $n-C_{14}H_{30}$  pyrolysis represents mole fraction of  $n-C_{14}H_{30}$ , respectively.

## 2. Validation of present model

Mzé-Ahmed and coworkers<sup>2</sup> investigated *n*-tetradecane oxidation in a jet stirred reactor at 10 bar, 560 to 1030 K, the residence time of 1 s and three equivalence ratios ( $\phi = 0.5, 1.0$  and 2.0). Mole fractions were measured with gas chromatography and Fourier transformed infrared spectrometry. These literature data<sup>2</sup> were used to validate present model. Figures S2 and S3 provide experimental and simulated mole fractions at  $\phi = 0.5$  and 1.0, respectively.

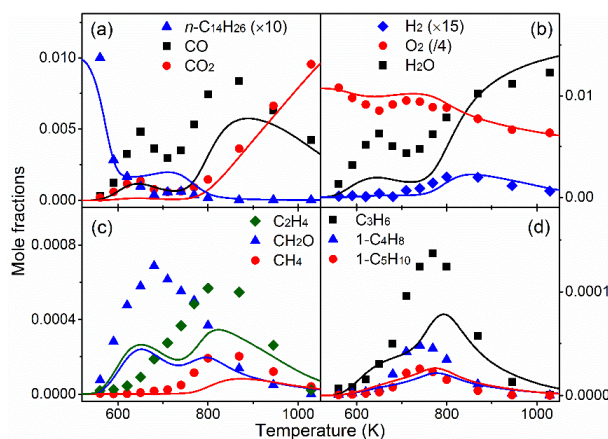

**Figure S2** Mole fractions for *n*-tetradecane oxidation in a jet stirred reactor at 10 bar,  $\tau = 1$  s and  $\phi = 0.5$ .

Symbols represent literature experiments<sup>2</sup>. Solid lines represent simulations by present model.

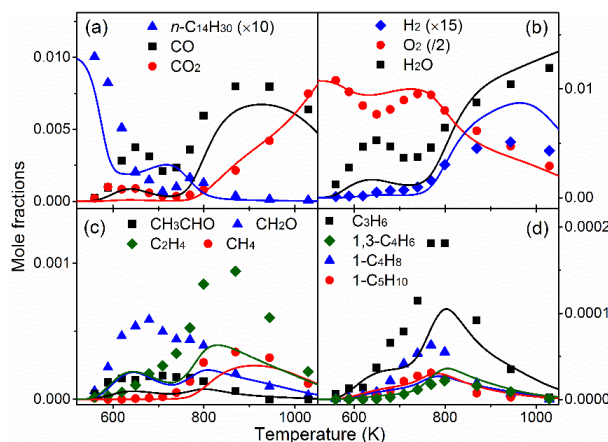

**Figure S3** Mole fractions for *n*-tetradecane oxidation in a jet stirred reactor at 10 bar,  $\tau = 1$  s and  $\phi = 1.0$ .

Symbols represent literature experiments<sup>2</sup>. Solid lines represent simulations by present model.

Moreover, performances of literature models, *i.e.* Westbrook model<sup>3</sup>, Mzé-Ahmed model<sup>2</sup>, Chang model<sup>4</sup>, and present model against literature JSR experimental data<sup>2</sup> are presented in Fig. S4.

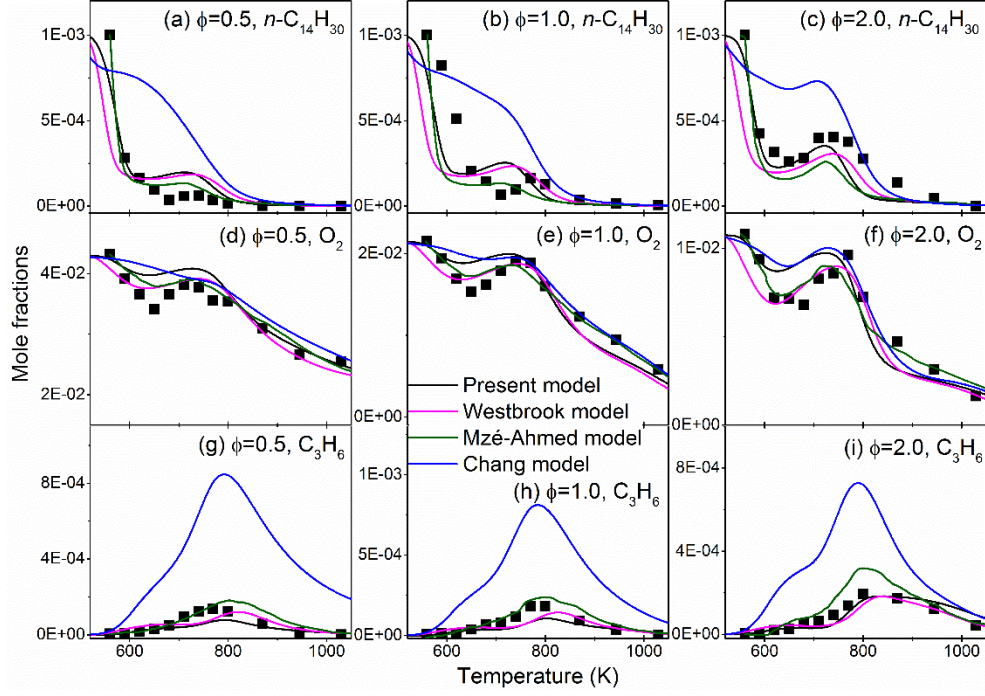

**Figure S4** Mole fractions for *n*-tetradecane oxidation in a jet stirred reactor at 10 bar,  $\tau = 1$  s and  $\phi = 0.5, 1.0$  and 2.0. Symbols represent literature experiments<sup>2</sup>. Solid lines represent simulations by present model, Westbrook model<sup>3</sup>, Mzé-Ahmed model<sup>2</sup> and Chang model<sup>4</sup>, respectively.

### 3. Ignition delay times of *n*-decane, *n*-dodecane and *n*-tetradecane

Shen and coworkers<sup>5</sup> investigated ignition delay times of *n*-decane/air mixtures, *n*-dodecane/air mixtures and *n*-tetradecane/air mixtures in a heated shock tube at  $\phi = 0.5$  and 1.0 at similar experimental conditions. Both literature experiments of *n*-decane, *n*-dodecane and *n*-tetradecane as well as simulations by present model are shown in Fig. S5.

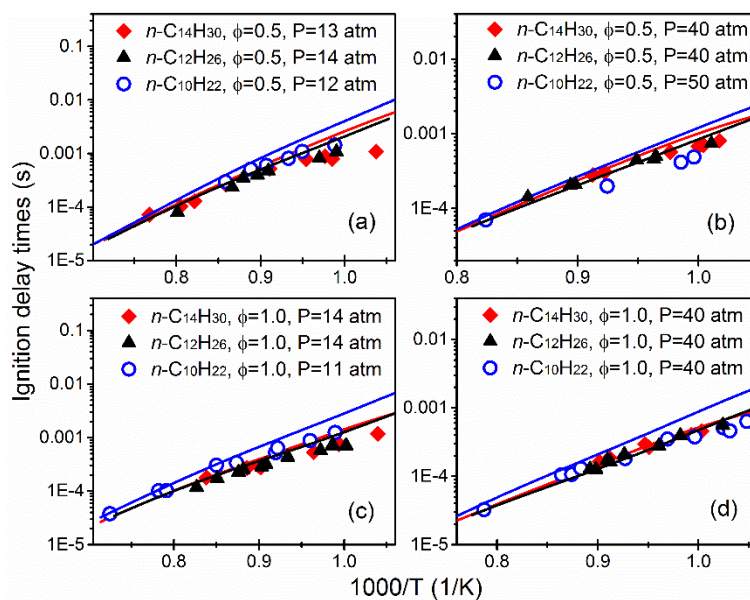

**Figure S5** Ignition delay times of *n*-decane/air mixtures, *n*-dodecane/air mixtures and *n*-tetradecane/air mixtures.

Symbols represent literature experimental ignition delay times from Shen and coworkers<sup>5</sup>. Lines represent simulations by present model.

## References:

- (1) Zeng, M.R.; Yuan, W.H.; Wang, Y.Z.; Zhou, W.X.; Zhang, L.D.; Qi, F.; Li, Y.Y. *Combust. Flame* **2014**, *161*, 1701-1715.
- (2) Mzé-Ahmed, A.; Dagaut, P.; Dayma, G.; Diévar, P.; Hadj-Ali, K. *Combust. Sci. Technol.* **2014**, *186*, 594-606.
- (3) Westbrook, C.K.; Pitz, W.J.; Herbinet, O.; Curran, H.J.; Silke, E.J. *Combust. Flame* **2009**, *156*, 181-199.
- (4) Chang, Y.C.; Jia, M.; Liu, Y.D.; Li, Y.P.; Xie, M.Z.; Yin, H.C. *Energy Fuels* **2013**, *27*, 3467-3479.
- (5) Shen, H.P.S.; Steinberg, J.; Vanderover, J.; Oehlschlaeger, M.A. *Energy Fuels* **2009**, *23*, 2482-2489.
